# Supplementary material for: Anti-Alzheimer chemical constituents of Morus macroura Miq.: chemical profiling, in silico and in vitro investigations
Source: Royal Society of Chemistry journal article supplement (doi:10.1039/d1fo01177d), 2021-01-01
Supplement: d1fo01177d1.pdf [file d1fo01177d1.pdf]

## **Supplementary Material**

### **Anti-Alzheimer chemical constituents of *Morus macroura* Miq.: Chemical profiling, *in silico*, and *in vitro* investigations**

Seham S. El-Hawary<sup>a,‡</sup>, Ahmed. M. Sayed<sup>b,‡</sup>, Marwa Y. Issa<sup>a</sup>, Hanaa S. Ebrahim<sup>c</sup>, Rania Alaaeldin<sup>d</sup>, Mahmoud A. Elrehany<sup>d</sup>, Essam M. Abd El-Kadder<sup>e</sup>, and Usama Ramadan Abdelmohsen<sup>f,g,\*</sup>

<sup>a</sup>Pharmacognosy Department, Faculty of Pharmacy, Cairo University, Cairo, Egypt

<sup>b</sup>Department of Pharmacognosy, Faculty of Pharmacy, Nahda University, Beni-Suef 62513, Egypt

<sup>c</sup>National Nutrition Institute, General Organization For Teaching Hospitals and Institutes, Cairo, Egypt

<sup>d</sup>Department of Biochemistry, Faculty of Pharmacy, Deraya University, New Minia 61111, Egypt

<sup>e</sup>Timber Trees Department, Horticulture Research Institute, Agriculture Research center, Giza, Egypt

<sup>f</sup>Pharmacognosy Department, Faculty of Pharmacy, Minia University, Minia 61519, Egypt

<sup>g</sup>Department of Pharmacognosy, Faculty of Pharmacy, Deraya University, NewMinia 61111, Egypt

<sup>‡</sup>Those authors have equally contributed to this work

**\*Corresponding author:**

[usama.ramadan@mu.edu.eg](mailto:usama.ramadan@mu.edu.eg), Tel: +2-86-2347759, +20 86-2369075

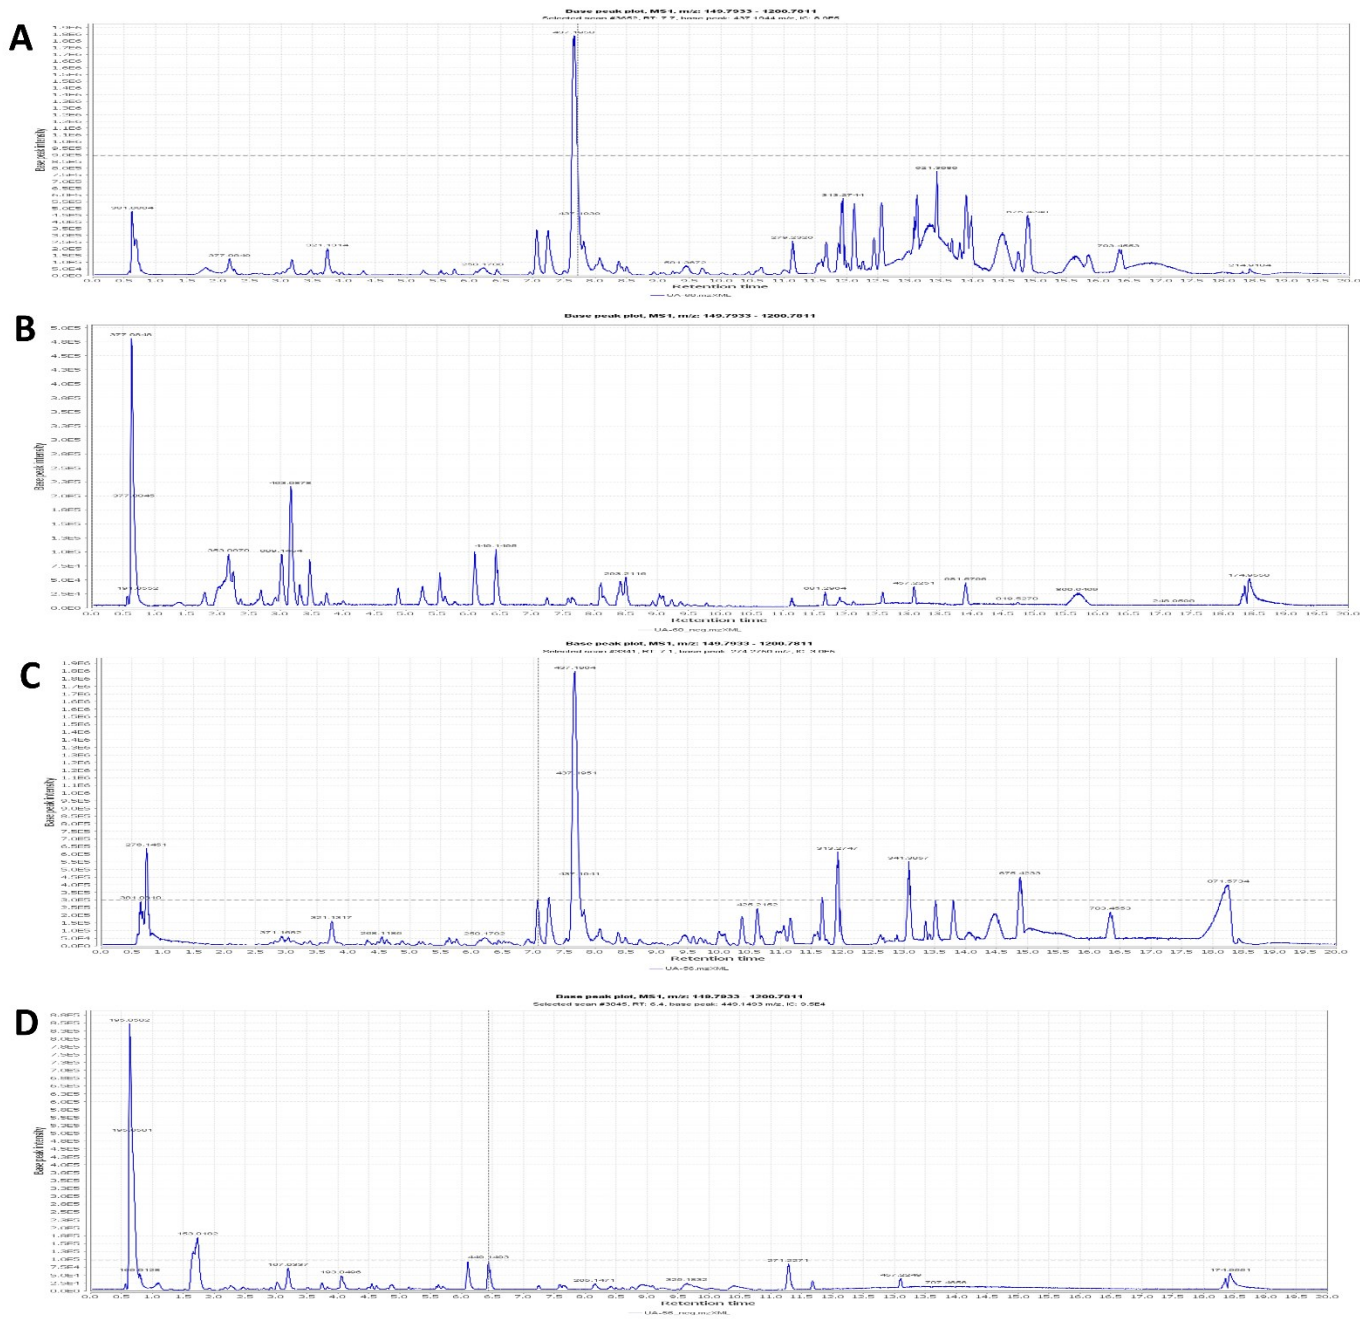

**Figure S1.** LC-HRESIMS base peak intensity (positive and negative modes) chromatograms of MLE (A and B) and MFE (C and D), respectively.

**Table S1.** The abbreviations and names of 82 protein targets related to Alzheimer's disease.

| No.                   | Target | Full name                                                             |
|-----------------------|--------|-----------------------------------------------------------------------|
| 1                     | APP    | Beta amyloid A4 (resveratrol and ferulic acid and Chrysin)            |
| 2                     | MAOA   | Monoamine oxidase A (Resveratrol and chrysin)                         |
| 3                     | MAOB   | Monoamine oxidase B (Ferulic acid and chrysin)                        |
| 4                     | ACHE   | Acetylcholinesterase                                                  |
| 5                     | BCHE   | Butyrylcholinesterase                                                 |
| 6                     | PIK3CB | PI3-kinase p110-beta subunit                                          |
| 7                     | PIK3CA | PI3-kinase p110-alpha subunit                                         |
| 8                     | BACE1  | Beta-Secretase 1                                                      |
| 9                     | BACE2  | Beta secretase 2                                                      |
| 10                    | HTR7   | Serotonin 7 (5-HT7) receptor                                          |
| 11                    | HTR6   | Serotonin 6 (5-HT6) receptor                                          |
| 12                    | MAPT   | Microtubule-associated protein tau                                    |
| 13                    | CDK5   | Cyclin-dependent kinase 5/CDK5 activator 1                            |
| 14                    | PTGS2  | Cyclooxygenase-2 (and resveratrol)                                    |
| 15                    | PSEN1  | Presenilin 1                                                          |
| 16                    | PSEN2  | Presenilin 2                                                          |
| 17                    | APOE   | Apolipoprotein E                                                      |
| 18                    | ABCA7  | ATP Binding Cassette Subfamily A Member 7                             |
| 19                    | SNCA   | Synuclein Alpha                                                       |
| 20                    | SORL1  | Sortilin Related Receptor 1                                           |
| 21                    | ADAM10 | ADAM Metallopeptidase Domain 10                                       |
| 22                    | A2M    | Alpha-2-Macroglobulin                                                 |
| 23                    | NOS3   | Nitric Oxide Synthase 3                                               |
| 24                    | PRNP   | Prion Protein                                                         |
| 25                    | TREM2  | Triggering Receptor Expressed On Myeloid Cells 2                      |
| 26                    | MT-ND1 | Mitochondrially Encoded NADH:Ubiquinone Oxidoreductase Core Subunit 1 |
| 27                    | HFE    | Homeostatic Iron Regulator                                            |
| 28                    | PLAU   | Plasminogen Activator, Urokinase                                      |
| 29                    | SNCB   | Synuclein Beta                                                        |
| 30                    | GRN    | Granulin Precursor                                                    |
| 31                    | MT-ND2 | Mitochondrially Encoded NADH:Ubiquinone Oxidoreductase Core Subunit 2 |
| 32                    | UNC5C  | Unc-5 Netrin Receptor C                                               |
| 33                    | TOMM40 | Translocase Of Outer Mitochondrial Membrane 40                        |
| 34                    | MPO    | Myeloperoxidase                                                       |
| 35                    | GSK3B  | Glycogen Synthase Kinase 3 Beta                                       |
| 36                    | COMT   | Catechol-O-Methyltransferase                                          |
| 37                    | PRKN   | Parkin RBR E3 Ubiquitin Protein Ligase                                |
| 38                    | CLU    | Clusterin                                                             |
| 39                    | HTR2A  | 5-Hydroxytryptamine Receptor 2A                                       |
| 40                    | LRP1   | LDL Receptor Related Protein 1                                        |
| <b>Table S1 Cont.</b> |        |                                                                       |

| No. | Target                             | Full name                                                |
|-----|------------------------------------|----------------------------------------------------------|
| 41  | Serpin Family A Member 3<br>MIR29A | Serpin Family A Member 3 MicroRNA 29a                    |
| 42  | DRD3                               | Dopamine Receptor D3                                     |
| 43  | MIR29B1                            | MicroRNA 29b-1                                           |
| 44  | IDE                                | Insulin Degrading Enzyme                                 |
| 45  | MIR107                             | MicroRNA 107                                             |
| 46  | MIR146A                            | MicroRNA 146a                                            |
| 47  | CHAT                               | Choline <i>O</i> -Acetyltransferase                      |
| 48  | CTSD                               | Cathepsin D                                              |
| 49  | TNF                                | Tumor Necrosis Factor                                    |
| 50  | APBB1                              | Amyloid Beta Precursor Protein Binding Family B Member 1 |
| 51  | BDNF                               | Brain Derived Neurotrophic Factor                        |
| 52  | NCSTN                              | Nicastrin                                                |
| 53  | PICALM                             | Phosphatidylinositol Binding Clathrin Assembly Protein   |
| 54  | HSD17B10                           | Hydroxysteroid 17-Beta Dehydrogenase 10                  |
| 55  | CDK5R1                             | Cyclin Dependent Kinase 5 Regulatory Subunit 1           |
| 56  | COL25A1                            | Collagen Type XXV Alpha 1 Chain                          |
| 57  | ACE                                | Angiotensin I Converting Enzyme                          |
| 58  | PLD3                               | Phospholipase D Family Member 3                          |
| 59  | PSENEN                             | Presenilin Enhancer, Gamma-Secretase Subunit             |
| 60  | CASP3                              | Caspase 3                                                |
| 61  | CR1                                | Complement C3b/C4b Receptor 1                            |
| 62  | IL1B                               | Interleukin 1 Beta                                       |
| 63  | MME                                | Membrane Metalloendopeptidase                            |
| 64  | CALHM1                             | Calcium Homeostasis Modulator 1                          |
| 65  | IL1A                               | Interleukin 1 Alpha                                      |
| 66  | TF                                 | Transferrin                                              |
| 67  | GAPDH                              | Glyceraldehyde-3-Phosphate Dehydrogenase                 |
| 68  | SOD1                               | Superoxide Dismutase 1                                   |
| 69  | IL6                                | Interleukin 6                                            |
| 70  | PTGS2                              | Prostaglandin-Endoperoxide Synthase 2                    |
| 71  | VLDLR                              | Very Low Density Lipoprotein Receptor                    |
| 72  | MAPK1                              | Mitogen-Activated Protein Kinase 1                       |
| 73  | DHCR24                             | 24-Dehydrocholesterol Reductase                          |
| 74  | CAPN1                              | Calpain 1                                                |
| 75  | VCP                                | Valosin Containing Protein                               |
| 76  | APLP2                              | Amyloid Beta Precursor Like Protein 2                    |
| 77  | CHRNA7                             | Cholinergic Receptor Nicotinic Alpha 7 Subunit           |

**Table S1 Cont.**

| <b>No.</b> | <b>Target</b> | <b>Full name</b>                            |
|------------|---------------|---------------------------------------------|
| 78         | NGF           | Nerve Growth Factor                         |
| 79         | CLSTN1        | Calsyntenin 1                               |
| 80         | OLR1          | Oxidized Low Density Lipoprotein Receptor 1 |
| 81         | INS           | Insulin                                     |
| 82         | NOS1          | Nitric Oxide Synthase 1                     |



**Table S2.** The 13 AD-related proteins targeted by the 4 key constituents of MFE and MLE (i.e. ferulic acid, resveratrol, chrysin, and moracin D).

| No.      | Target               | Full name                                  | Uniport ID           | SWISS Target Prediction (Probability) | PharmMapper (Fit score)            | Vina score kcal/mol                                      |
|----------|----------------------|--------------------------------------------|----------------------|---------------------------------------|------------------------------------|----------------------------------------------------------|
| 1        | APP                  | Beta amyloid A4                            | P05067               | FA (5.1%); Chr (13.5%); Res (100%)    | -                                  | -                                                        |
| 2        | MAOA                 | Monoamine oxidase A                        | P21397               | Chr (27.6%); Res (100%) <sup>#</sup>  | Chr (1.1); Res (1.5)               | Res (-6.6)                                               |
| 3        | PIK3CB               | PI3-kinase p110-beta subunit               | P42338               | Res (100%)                            | -                                  | Res (-6.4);                                              |
| 4        | PIK3CA               | PI3-kinase p110-alpha subunit              | P42336               | Res (100%)                            | Res (1.2); Chr (1.3)               | Res (-6.6);                                              |
| <b>5</b> | <b><u>MAOB*</u></b>  | <b><u>Monoamine oxidase B</u></b>          | <b><u>P27338</u></b> | <b><u>FA (7.2%)</u></b>               | <b><u>FA (2.6)</u></b>             | <b><u>FA (-8.1);<br/>Chr (-7.8)</u></b>                  |
| 6        | <b><u>BACE1*</u></b> | <b><u>Beta secretase 1</u></b>             | <b><u>P56817</u></b> | <b><u>Mor (10.1%)</u></b>             | <b><u>Mor (4.1); Chr (3.8)</u></b> | <b><u>Mor (-9.6);<br/>Chr (-8.4);<br/>Res (-7.5)</u></b> |
| 7        | HTR7                 | Serotonin 7 (5-HT7) receptor               | P34969               | Mor (10.2%)                           | -                                  | Mor (-7.3)                                               |
| 8        | HTR6                 | Serotonin 6 (5-HT6) receptor               | P50406               | Mor (10%)                             | -                                  | -                                                        |
| 9        | <b><u>ACHE*</u></b>  | <b><u>Acetylcholinesterase</u></b>         | <b><u>P22303</u></b> | <b><u>Chr (35%)</u></b>               | <b><u>Res (2.9); Chr (4.3)</u></b> | <b><u>Res (-8.1);<br/>Chr (-9.9)</u></b>                 |
| 10       | BCHE                 | Butyrylcholinesterase                      | P06276               | Chr (17.4%)                           | Res (1.3); Chr (2.2)               | Res (-6.1);<br>Chr (-7.1)                                |
| 11       | MAPT                 | Microtubule-associated protein tau         | P10636               | Chr (11.9%)                           | -                                  | -                                                        |
| 12       | CDK5                 | Cyclin-dependent kinase 5/CDK5 activator 1 | Q00535               | Chr (100%)                            | Chr (4.6); Res (3.3); FA (2.4)     | Chr (-9.2);<br>Res (-8.4);<br>FA (-7.4)                  |
| 13       | PTGS2                | Cyclooxygenase-2                           | P35354               | Chrysin (27.6%); Res(100%)            | Chr (3.3); Res (4.5); FA (3.5)     | Chr (-8.3);<br>Res (-8.1);<br>FA (-7.3)                  |

FA = Ferulic acid; Chr = Chrysin; Res = Resveratrol; Mor = Moracin D.

\*This protein target was selected for the in-vitro validation.

Only compounds that got 100% probability score in SWISS prediction or docking score < -6 kcal/mol were selected for the compound-protein interaction map.
